# Supplementary material for: Observation of Chronic Graft-Versus-Host Disease Mouse Model Cornea with In Vivo Confocal Microscopy
Source: MDPI journal article supplement (doi:10.3390/diagnostics11081515), 2021-08-23
Supplement: s1 [file s1]

# Supplementary Video and Figure legends

## Observation of Chronic Graft-Versus-Host Disease

### Mouse Model Cornea with In Vivo Confocal Microscopy

Shota Shimizu <sup>1</sup>, Shinri Sato <sup>1,\*</sup>, Hiroko Taniguchi <sup>1</sup>, Eisuke Shimizu <sup>1</sup>, Jingliang He <sup>1,2</sup>,  
Shunsuke Hayashi <sup>1</sup>, Kazuno Negishi <sup>1</sup>, Yoko Ogawa <sup>1,\*</sup> and Shigeto Shimmura <sup>1</sup>

<sup>1</sup> Department of Ophthalmology, Keio University School of Medicine, Tokyo 160-8582, Japan; shimisho@keio.jp (S.Shimizu.); shinri.sato259@keio.jp (S.Sato.); tani@keio.jp (H.T.); ophthalmolog1st.acek39@keio.jp (E.S.); shun.hayashi8840@keio.jp (S.H.); kazunonegishi@keio.jp (K.N.); yoko@z7.keio.jp (Y.O.); shige.shimmura@keio.jp (S.Shimmura)

<sup>2</sup> Eye center, The Second Affiliated Hospital of Zhejiang University School of Medicine, Hangzhou, China; hejingliangai@126.com (J.H.)

\* Co-correspondence: shinri.sato259@keio.jp; Tel.: +81-3-3353-1211;(S. Sato);Tel.: +81-3-3353-1211; yoko@z7.keio.jp; Tel.: +81-3-3353-1211;(Y.O)

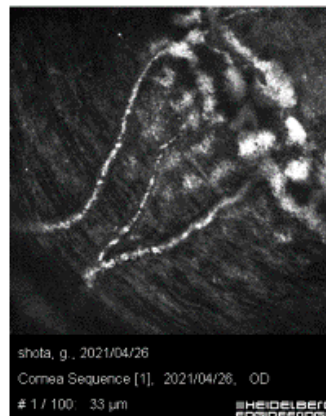

**Supplementary Video S1.** In vivo confocal microscopy video of neovascularization in cornea of the allogeneic group 1 week after bone marrow transplantation. Blood cells can be seen flowing through the vessels.

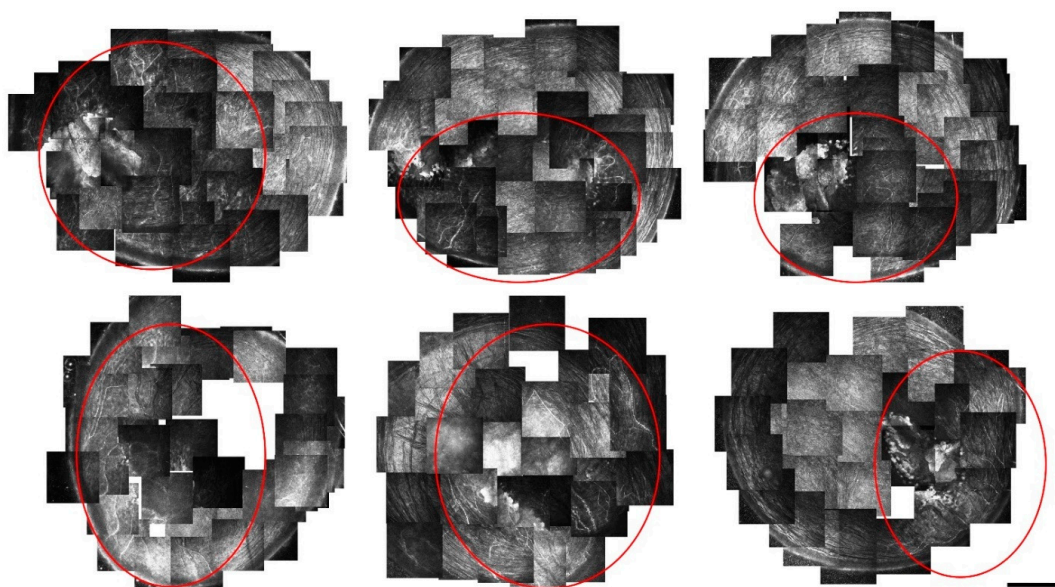

**Supplementary Figure S1.** Neovascularization in corneas of the allogeneic group 1 week after bone marrow transplantation shown by in vivo confocal microscopy (red circle). Scale bar = 500  $\mu\text{m}$ .
